# Supplementary material for: Comparative description of ten transcriptomes of newly sequenced invertebrates and efficiency estimation of genomic sampling in non-model taxa
Source: PubMed Central journal article supplement (PMC3538665; doi:10.1186/1742-9994-9-33), 2012-11-29

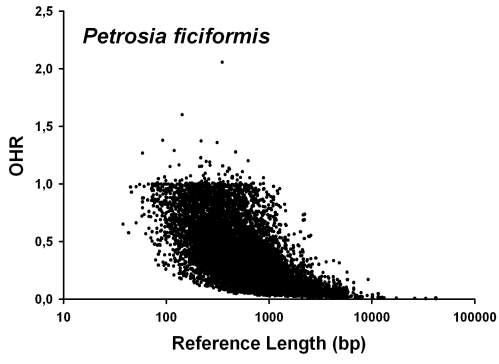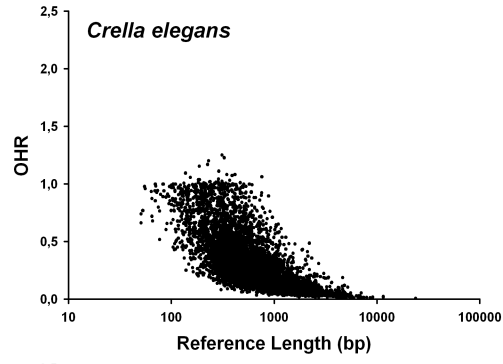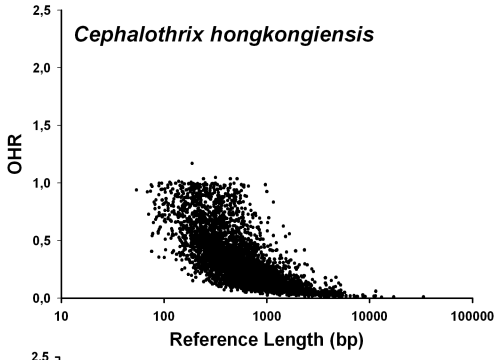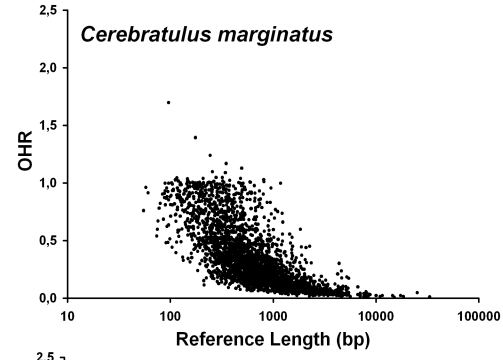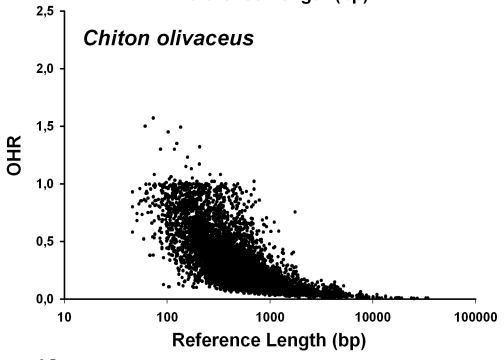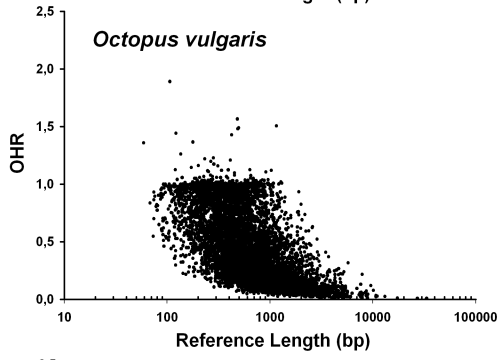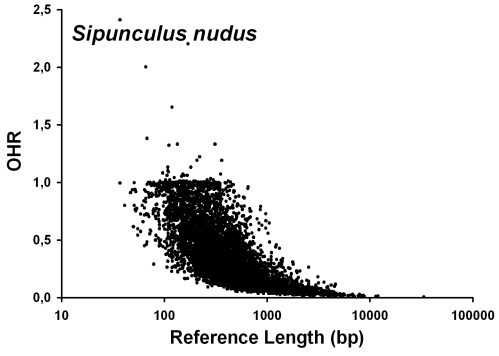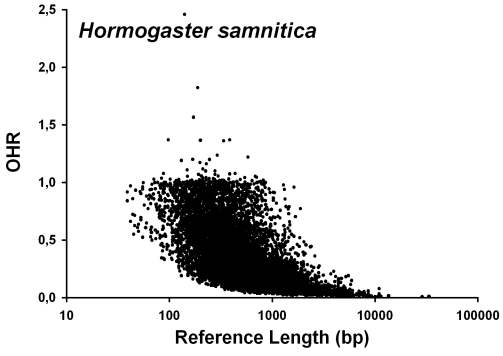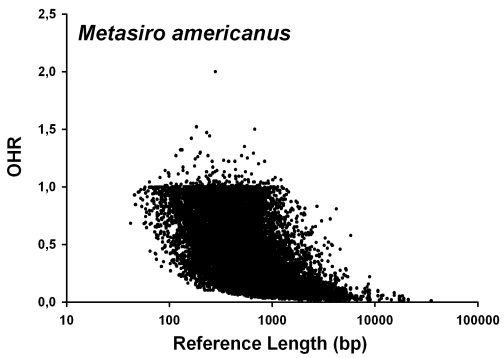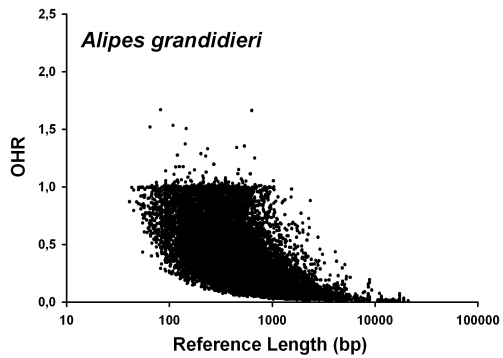

Supplement: 1742-9994-9-33-S9.pdf [file 1742-9994-9-33-S9.pdf]
