# Supplementary material for: Comparative description of ten transcriptomes of newly sequenced invertebrates and efficiency estimation of genomic sampling in non-model taxa
Source: Front Zool. 2012 Nov 29;9:33. doi: 10.1186/1742-9994-9-33 (PMC3538665; doi:10.1186/1742-9994-9-33)
Supplement: Additional file 4 — Optimality criteria for the selection of best assembly. [file 1742-9994-9-33-S4.pdf]

## Sheet: Hoja1
	Criteria	Optimal solutions
1	Number of raw reads used	more reads = better
2	Trimming of reads	Trim the least number of reads possible
3	Number of contigs	ideally, the number of contigs should be close to the transcription units expected in a genome (e.g., 20-25,000 for a metazoan)
4	Number of contigs under 300 bp	usually contigs under 300 bp can hardly be identified or re-assembled, so the best assembly will contain a reduced number of these contigs
5	N50 of contigs	the median contig size should be the longest and approach the expected median length for full transcripts (e.g., for Caenorhabditis elegans is 1kb)
6	Mean contig length and SD	this should approach the expected mean length for full length transcripts (e.g., for C. elegans is 1,2 Kb)
7	Number of contigs greater than 1 Kb	the best assembly will have more contigs > 1 Kb
8	Maximum contig length	the longest contig should have credible blast matches to nr protein database
9	Total span of contigs	it should be in the range of 25 to 40 Mb approximately
10	Mapping of reads	the best assembly will have the minimum number of "naked" bases when reads are mapped back
11	Chimaera checking	taking the longest contigs, the best assembly should have a low percentage of possible chimaeras
